# Supplementary material for: Hydrogen evolution performance of Co-MOF/H-g-C3N4 composite catalysts with different morphologies under visible light
Source: Royal Society of Chemistry journal article supplement (doi:10.1039/d2nj05353e), 2023-01-01
Supplement: d2nj05353e1.pdf [file d2nj05353e1.pdf]

## Supporting Information

### Hydrogen evolution performance of Co-MOF/H-g-C<sub>3</sub>N<sub>4</sub> composite catalysts with different morphologies under visible light

Zhenlu Liu<sup>1</sup>, Jing Xu\*<sup>1,3,4</sup>, Tong Xue\*<sup>2</sup>, Xinyu Liu<sup>1</sup>, Shengming Xu<sup>1</sup>, Zezhong Li<sup>1</sup>

<sup>1</sup> School of Chemistry and Chemical Engineering, North Minzu University, Yinchuan 750021, PR China

<sup>2</sup> School of Materials Science and Engineering, North Minzu University, Yinchuan 750021, PR China

<sup>3</sup> Ningxia Key Laboratory of Solar Chemical Conversion Technology, North Minzu University, Yinchuan 750021, PR China

<sup>4</sup> Key Laboratory for Chemical Engineering and Technology, State Ethnic Affairs Commission, North Minzu University, Yinchuan 750021, PR China

Email: wgyxj2000@163.com

## 2. Materials and methods

### 2.1 Chemicals

The chemicals (analytical grade) used in this work were obtained from Aladdin: 2-Methylimidazole (C<sub>4</sub>H<sub>6</sub>N<sub>2</sub>), Cobaltous Nitrate Hexahydrate (Co(NO<sub>3</sub>)<sub>2</sub>·6H<sub>2</sub>O), Melamine (C<sub>3</sub>H<sub>6</sub>N<sub>6</sub>), Concentrated hydrochloric acid (HCl), deionized water.

### 2.2 Synthesis of H-g-C<sub>3</sub>N<sub>4</sub>

Weigh a certain quality of melamine into the tube furnace for calcination. The initial heating temperature was 50 °C, and the temperature was increased to 520 °C at a rate of 5 °C/min, and the temperature was maintained at 520 °C for 150 min. The graphite phase carbon nitride is obtained by grinding the naturally cooled powder.

Add 1g g-C<sub>3</sub>N<sub>4</sub> to a beaker of 20 ml concentrated hydrochloric acid. After stirring for 6 h, the proton fossil ink phase carbon nitride was obtained after washing and drying.

### 2.3 Characterization technique

X-ray diffraction (XRD): Cu K $\alpha$  radiation of 40 kV and 30 mA current, the crystallographic peaks in the range of 10 ° to 80 °, SmartlabSE.

Scanning electron microscope (SEM): ZEISS Sigma 500.

X-ray photoelectron spectroscopy (XPS): ESCALAB 250Xi.

Brunner-Emmet-Teller (BET): ASAP 2020 M.

Photoluminescence (PL): Fluoro Max-4.

UV-vis diffuse reflectance spectra (UV-Vis DRS): Lambda 750S.

Infrared spectra analysis (IR): Fourier transformation infrared spectrometer.

## 2.5 Electrochemistry and photocatalysis

The three electrodes of CHI 660E workstation are silver chloride, platinum tablet and sample smear respectively. 0.2 M  $\text{Na}_2\text{SO}_4$  solution as electrolyte, sample coating dispersion is 10% Nifon solution. A 300 W xenon lamp and a 420 nm cut-off were also used in electrochemical tests.

10 mg catalyst powder and 20 mg sensitizer were evenly dispersed in a flat bottomed quartz bottle containing 30 mL TEOA. The reaction solution was successively processed by ultrasound, agitation and aeration, and then put into the multi-channel photocatalytic reaction system (Beijing PerfectLight, PCX 50B Discover). Each hydrogen-producing cylinder was sampled hourly for five hours. Each sample of 500  $\mu\text{L}$  was injected into the gas chromatographic system (Ruili SP-2000, 13X chromatographic Column), and the hydrogen production rate was obtained based on the peak area of hydrogen production and the standard curve.

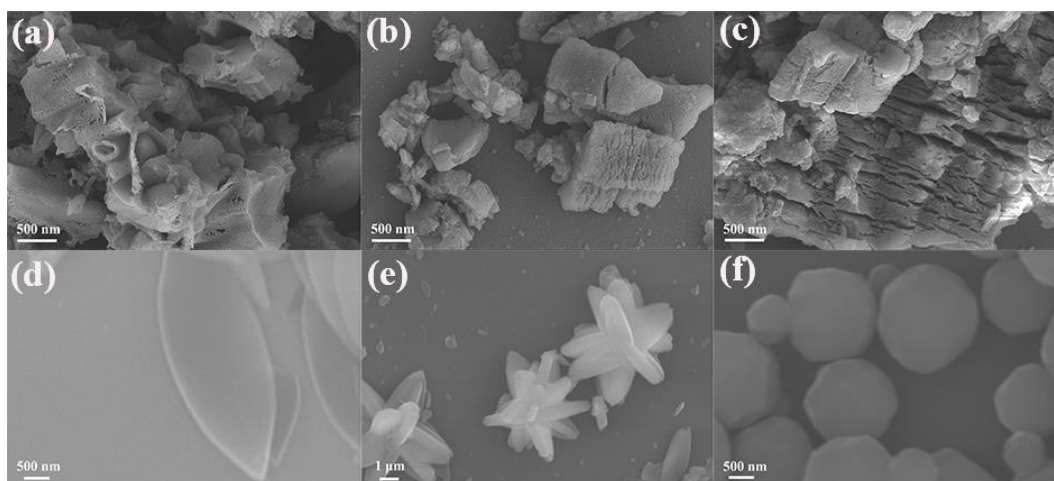

Figure S1(a) SEM of g-C<sub>3</sub>N<sub>4</sub>. (b)-(c) SEM of H-g-C<sub>3</sub>N<sub>4</sub>. (d) SEM of Co-MOF-B. (e) SEM of Co-MOF-D. (f) SEM of Co-MOF-H.

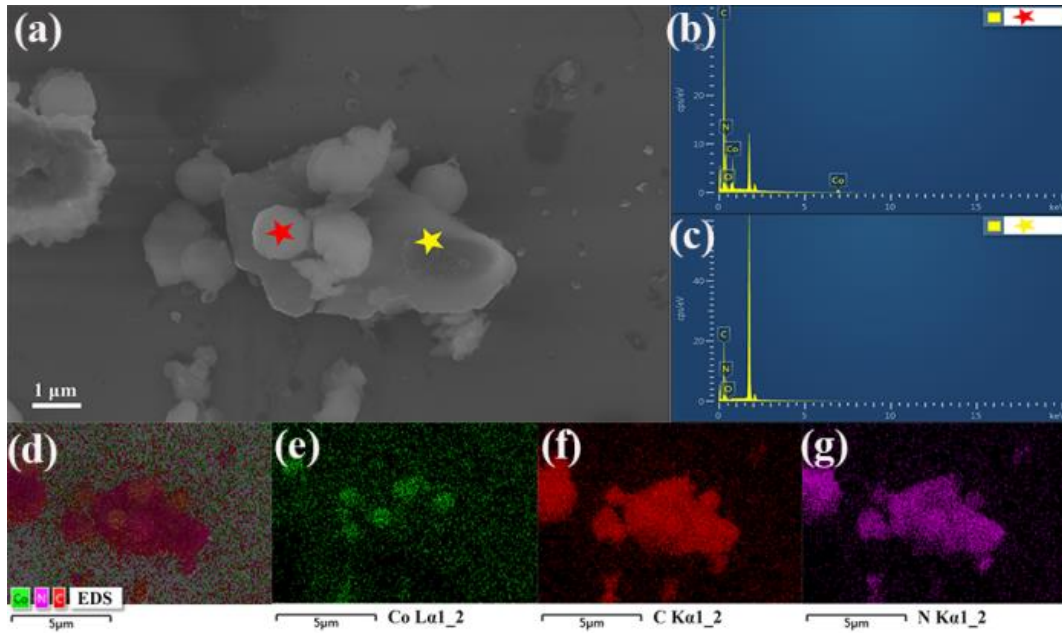

Figure S2(a) HH-125 element scan selection. (b) Element point scanning of Co-MOF-H. (c) Element point scanning of H-g-C<sub>3</sub>N<sub>4</sub>. (d) Selection of HH-125 element filters. (e) Co element distribution. (f) C element distribution. (g) N element distribution.

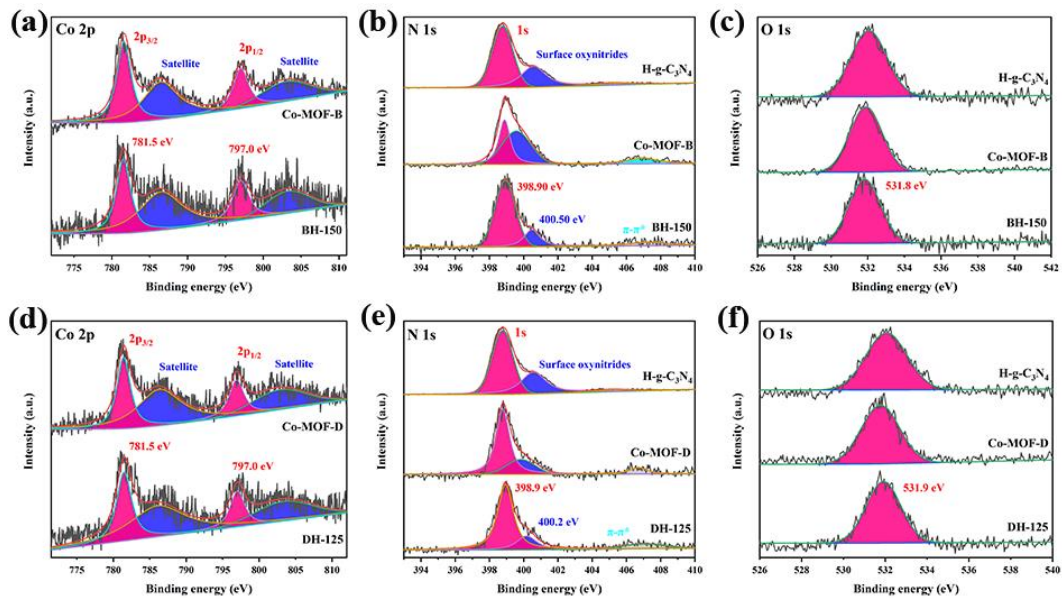

Figure S3(a)-(c) Fine analysis of Co, N and O elements for BH-150. (d)-(f) Fine analysis of Co, N and O elements for DH-125.

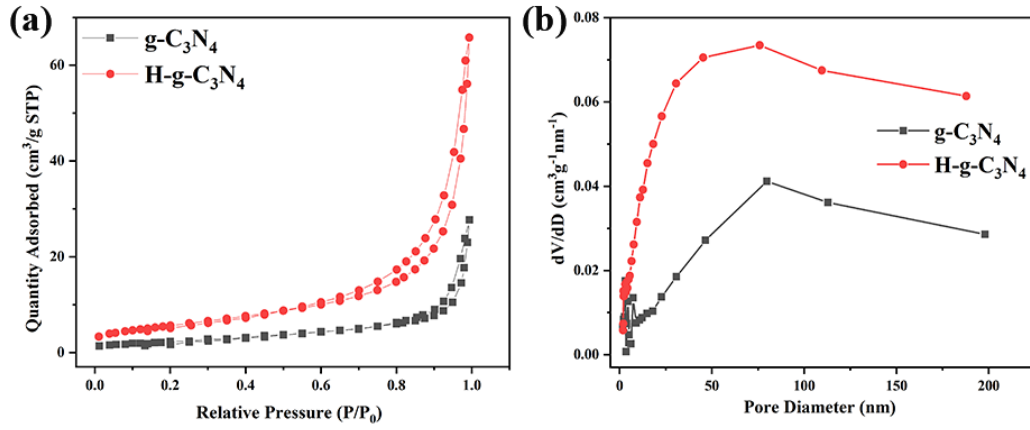

Figure S4(a) Nitrogen adsorption-desorption isotherms for  $g\text{-C}_3\text{N}_4$  and  $\text{H-g-C}_3\text{N}_4$ . (b) Aperture distribution maps of  $g\text{-C}_3\text{N}_4$  and  $\text{H-g-C}_3\text{N}_4$ .

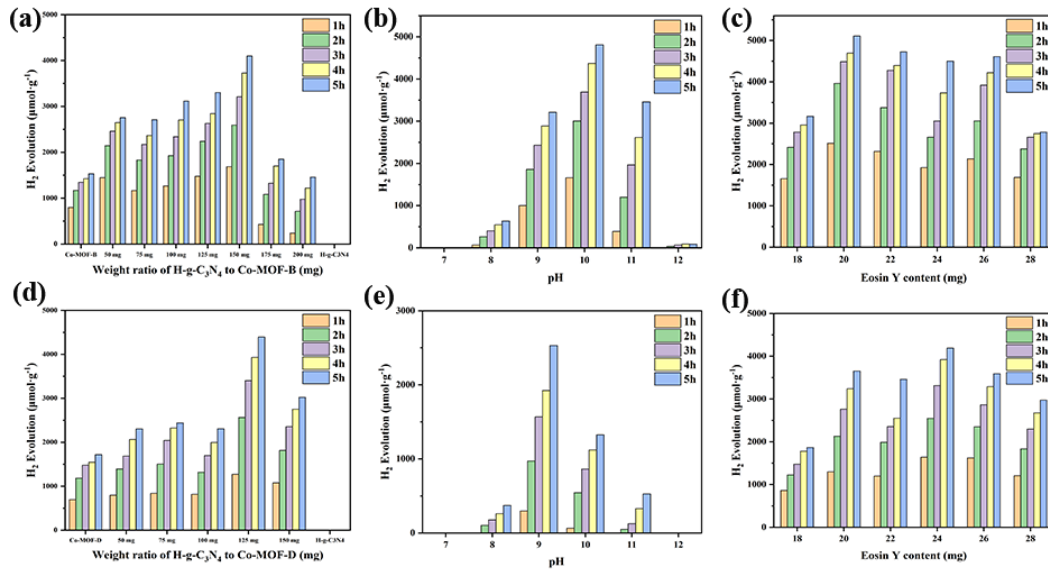

Figure S5(a)-(c) Regulation of hydrogen production performance of BH-150. (d)-(f) Regulation of hydrogen production performance of DH-125.

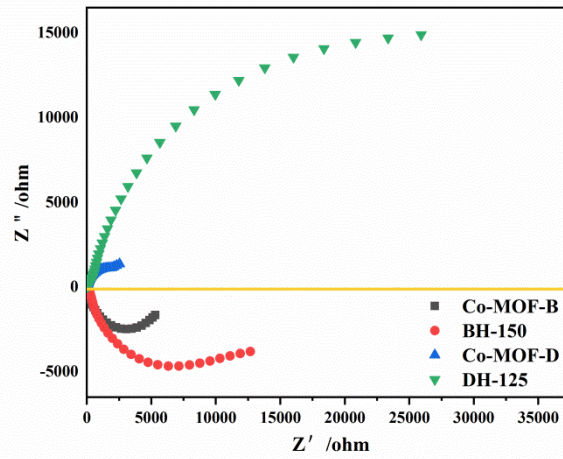

Figure S6 EIS impedance diagrams of The BH-150 and DH-125.

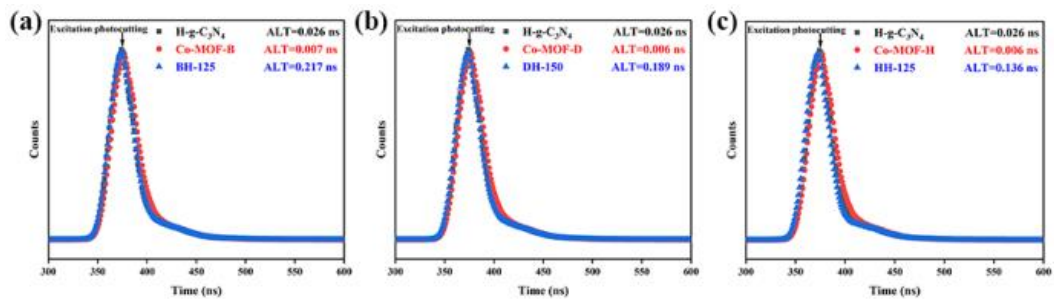

Figure S7(a-c) Fluorescence decay curves of BH-150, DH-125 and HH-125.

Table 1. Specific surface areas ( $S_{BET}$ ), pore volumes, and pore diameter of three samples.

| Samples                           | $S_{BET}(m^2 g^{-2})$ | Pore volume( $cm^3 g^{-1}$ ) | Average pore size(nm) |
|-----------------------------------|-----------------------|------------------------------|-----------------------|
| g-C <sub>3</sub> N <sub>4</sub>   | 8.27                  | 0.042                        | 17.16                 |
| H-g-C <sub>3</sub> N <sub>4</sub> | 20.86                 | 0.102                        | 18.76                 |
| Co-MOF-B                          | 13.60                 | 0.030                        | 7.23                  |
| Co-MOF-D                          | 4.34                  | 0.005                        | 39.38                 |
| Co-MOF-H                          | 1119.33               | 0.032                        | 5.15                  |
| BH-150                            | 12.91                 | 0.031                        | 11.15                 |
| DH-125                            | 9.66                  | 0.031                        | 13.71                 |
| HH-125                            | 580.76                | 0.039                        | 6.81                  |
